# Supplementary material for: Partial sulfur vacancies created by carbon–nitrogen deposition of MoS2 for high-performance overall electrocatalytic water splitting
Source: Royal Society of Chemistry journal article supplement (doi:10.1039/d1nr02966e), 2021-01-01
Supplement: d1nr02966e1.pdf [file d1nr02966e1.pdf]

## **Partial sulfur vacancy created by carbon-nitrogen deposition of MoS<sub>2</sub> for high-performance overall electrocatalytic water splitting**

*Wenxia Chen<sup>a\*</sup>, Wei Wei<sup>a</sup>, Kefeng Wang<sup>a</sup>, Jinhai Cui<sup>a</sup>, Xingwang Zhu<sup>b\*</sup> and Kostya (Ken) Ostrikov<sup>c</sup>*

<sup>a</sup>School of Chemistry and Chemical Engineering, Henan Key Laboratory of Biomolecular Recognition and Sensing, Henan D&A Engineering Center of Advanced Battery Materials, Shangqiu Normal University, Shangqiu 476000, China.

<sup>b</sup>School of the Environment and Safety Engineering, Jiangsu University, Zhenjiang, Jiangsu, 212013, China.

<sup>c</sup>School of Chemistry and Physics and Centre for Materials Science, Queensland University of Technology, Brisbane, QLD 4000, Australia.

\*Corresponding authors E-mail: [wxchenedu@163.com](mailto:wxchenedu@163.com), [zxwiii@sina.com](mailto:zxwiii@sina.com)

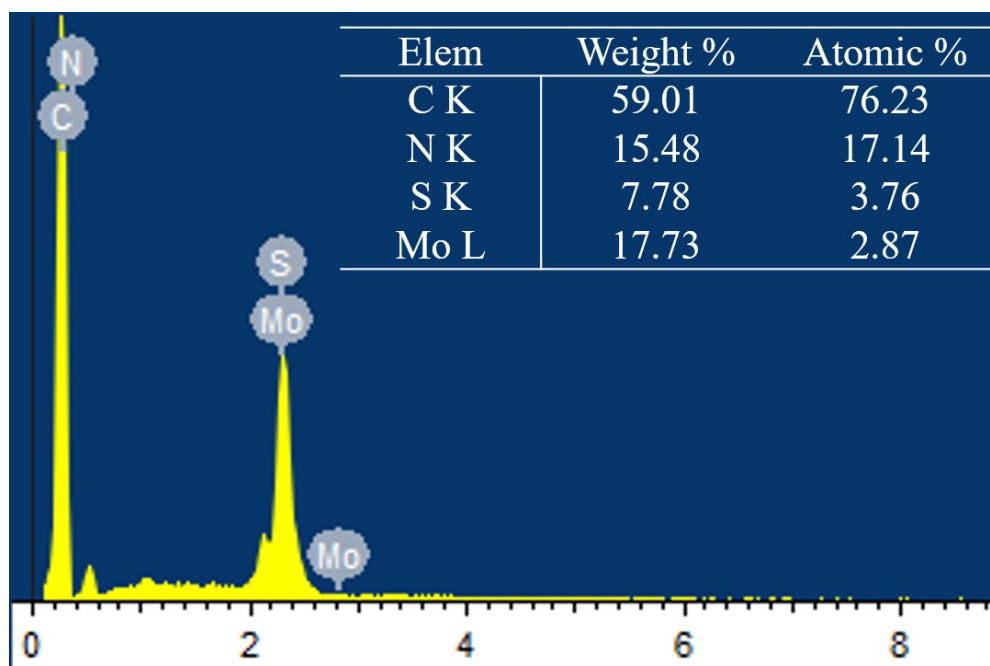

**Fig. S1.** The EDX spectral analysis of the C-N-MoS<sub>2</sub>/CC-700 material.

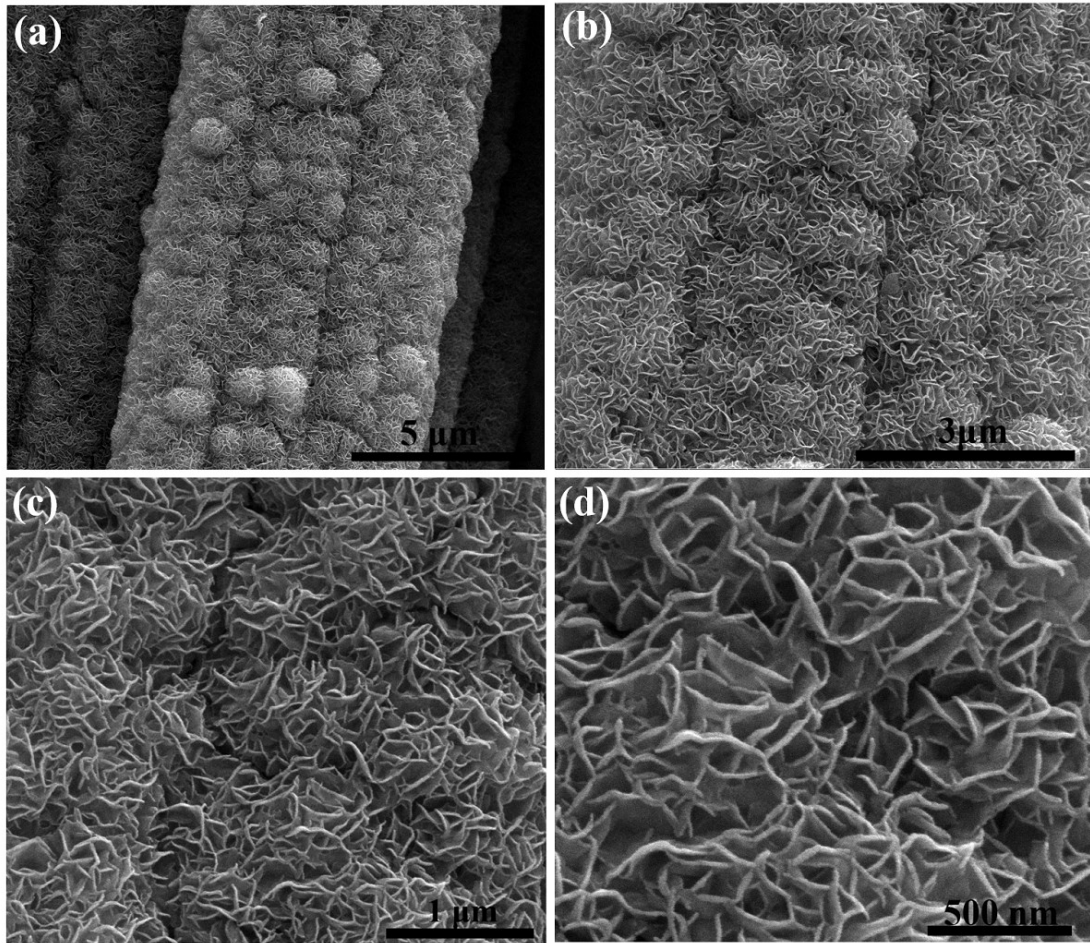

**Fig. S2.** The SEM image of the pure MoS<sub>2</sub>/CC.

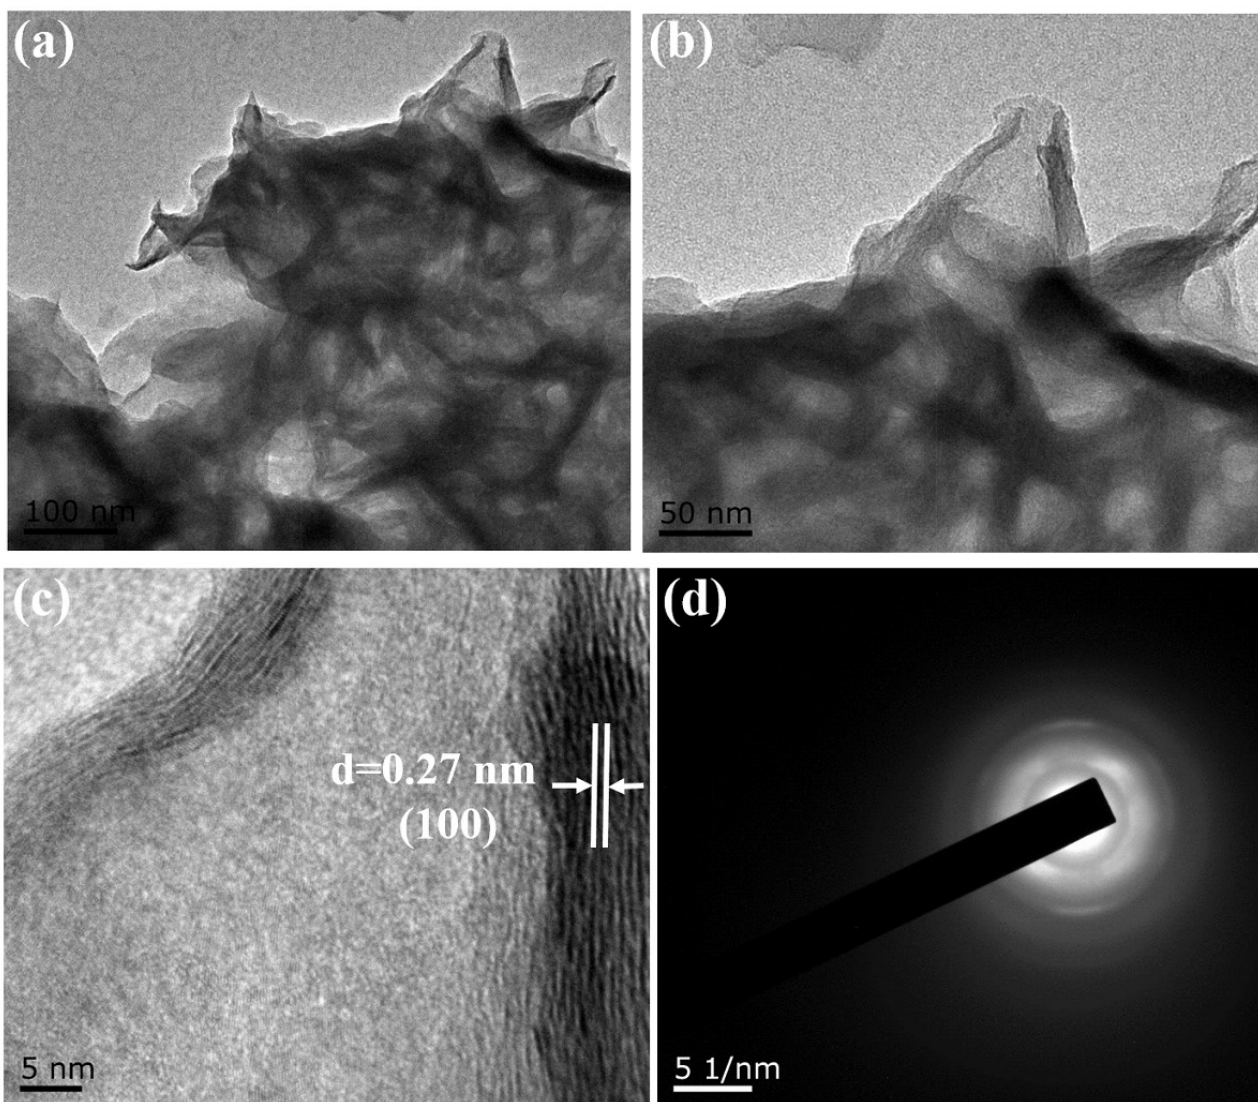

**Fig. S3.** (a) and (b) TEM image, (c) HRTEM image and (d) electron diffraction of the pure MoS<sub>2</sub>/CC.

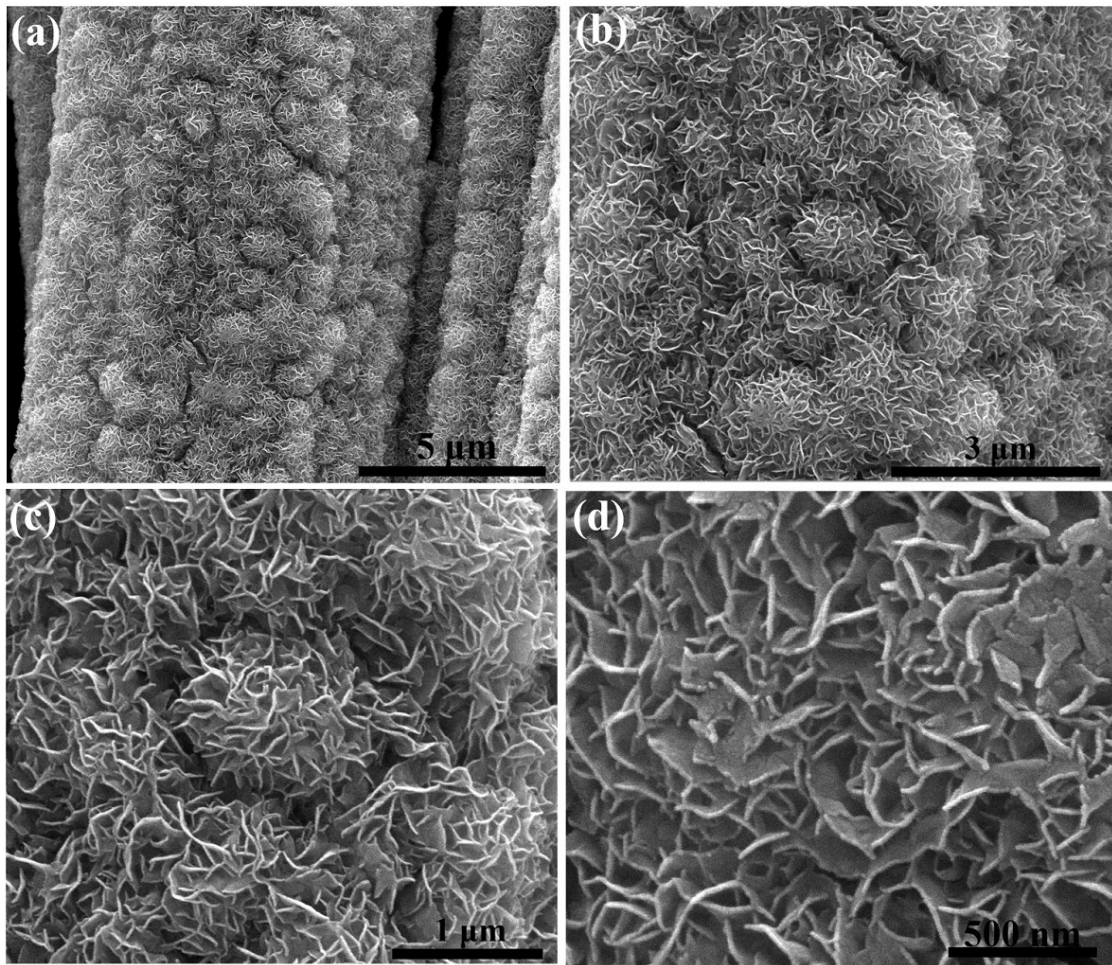

**Fig. S4.** The SEM image of the C-N-MoS<sub>2</sub>/CC-550.

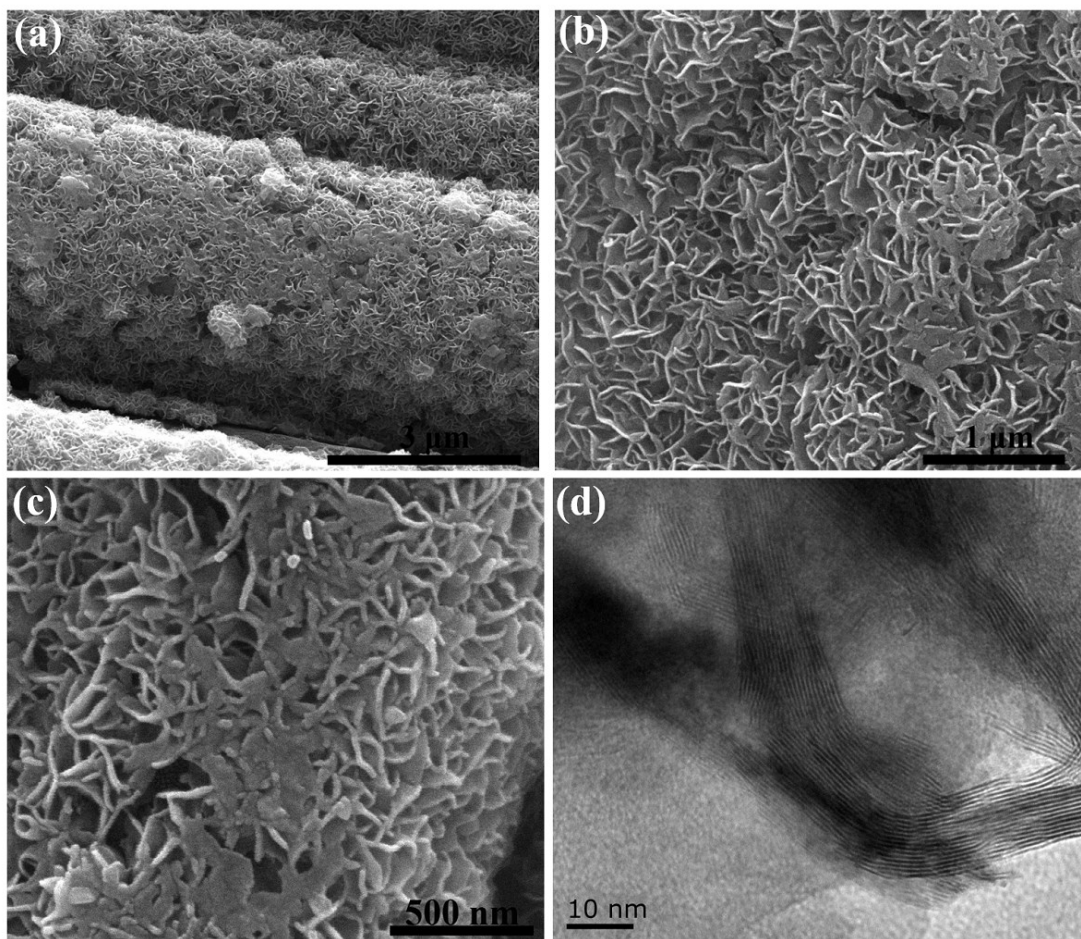

**Fig. S5.** The SEM image of the C-N-MoS<sub>2</sub>/CC-600.

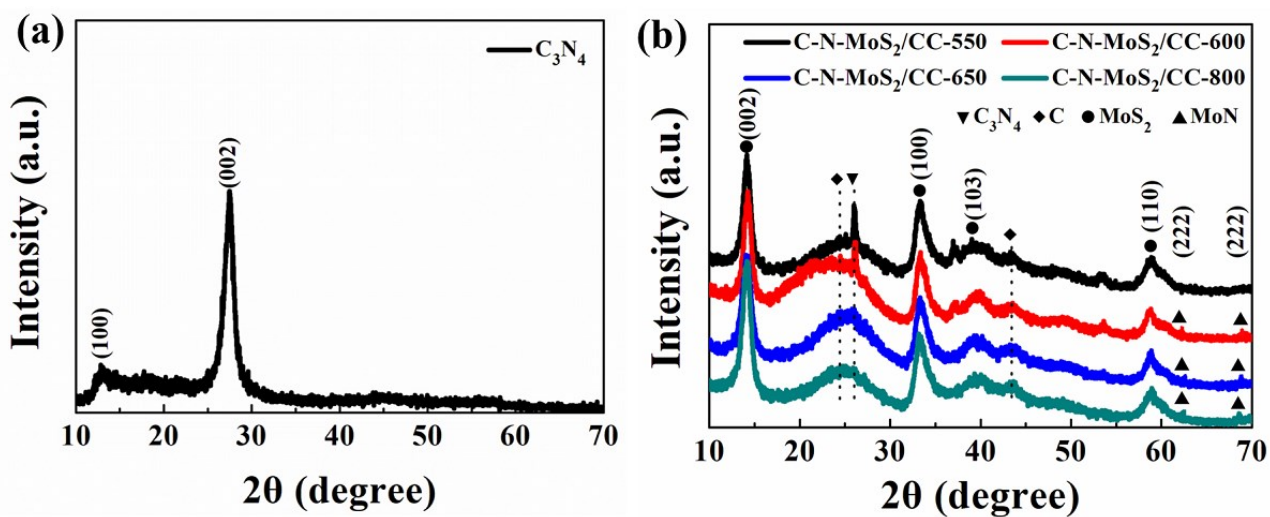

**Fig. S6.** The XRD patterns of the as-prepared catalyst: (a)  $C_3N_4$ , (b)  $C-N-MoS_2/CC-550$ ,  $C-N-MoS_2/CC-600$ ,  $C-N-MoS_2/CC-650$  and  $C-N-MoS_2/CC-800$ .

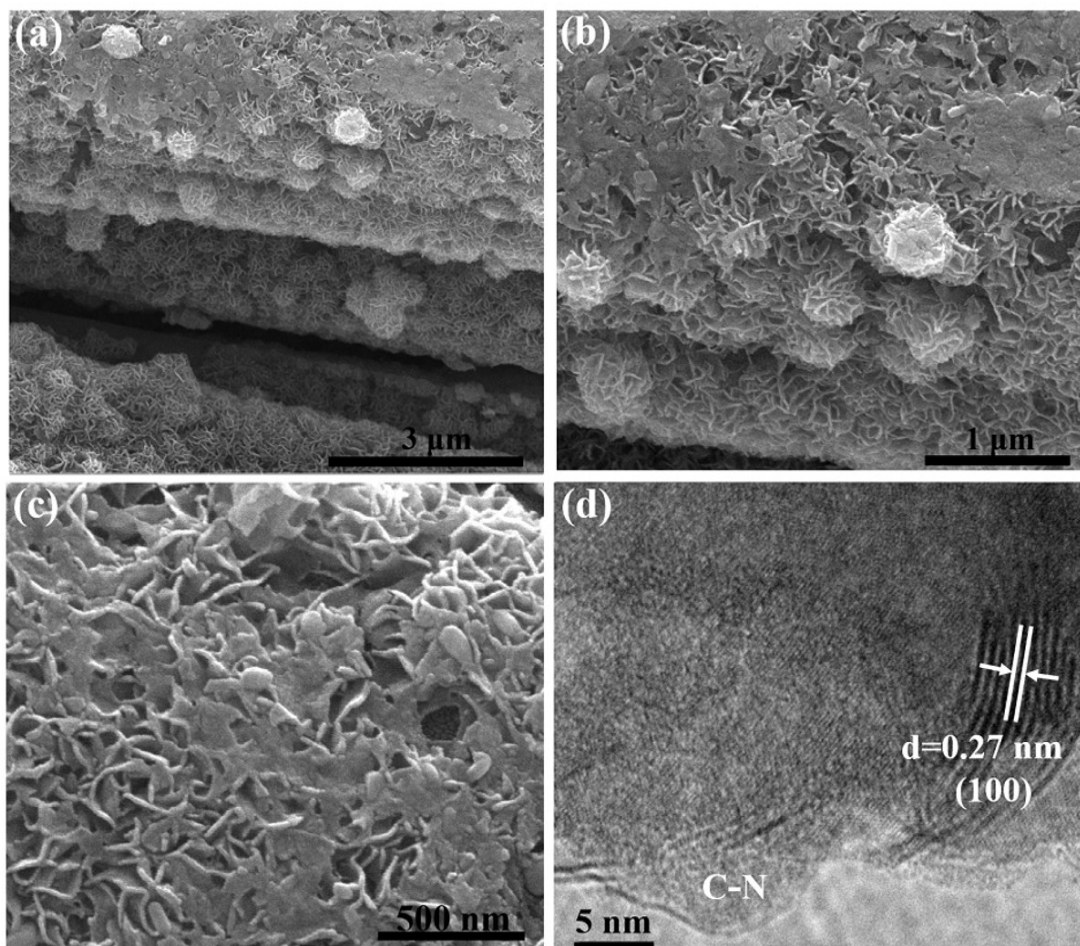

**Fig. S7.** (a), (b) and (c) The SEM image of the C-N-MoS<sub>2</sub>/CC-650, (d) The TEM image of the C-N-MoS<sub>2</sub>/CC-650.



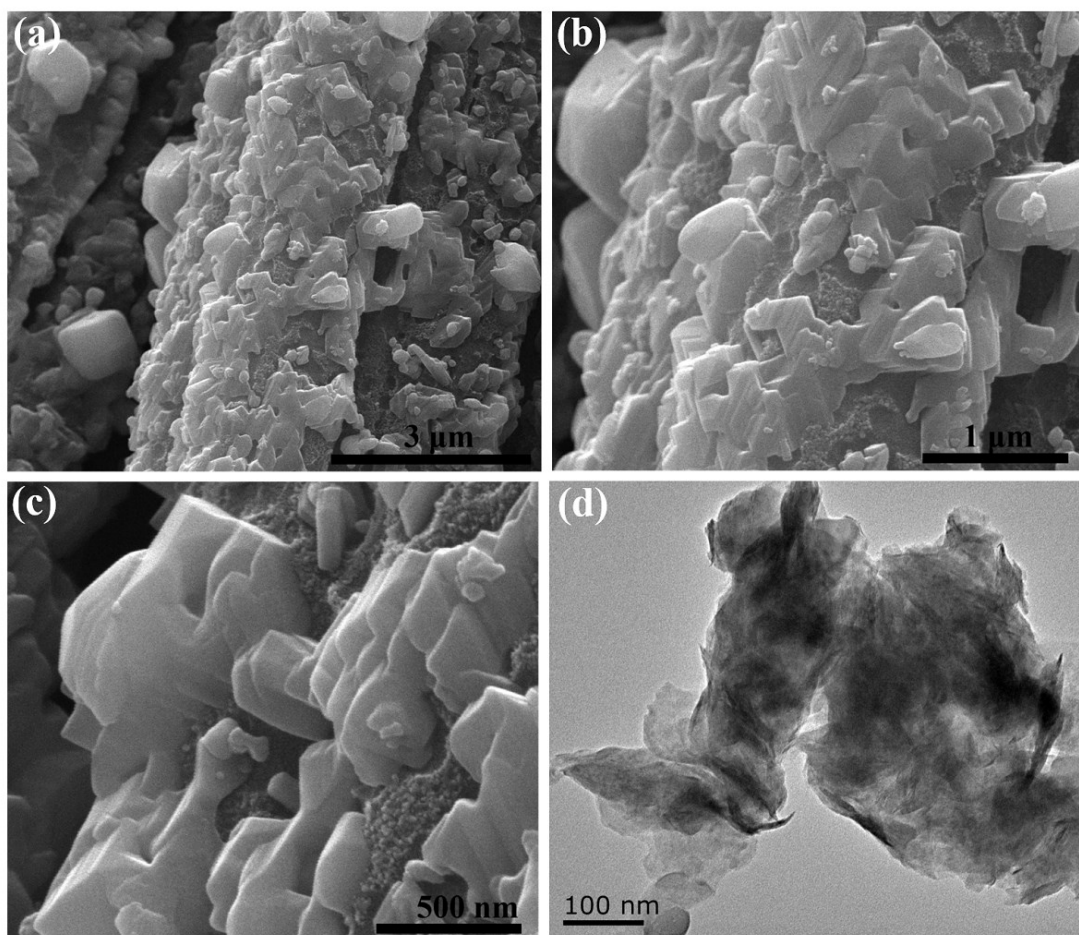

**Fig. S8.** (a), (b) and (c) The SEM image of the C-N-MoS<sub>2</sub>/CC-800, (d) The TEM image of the C-N-MoS<sub>2</sub>/CC-800.

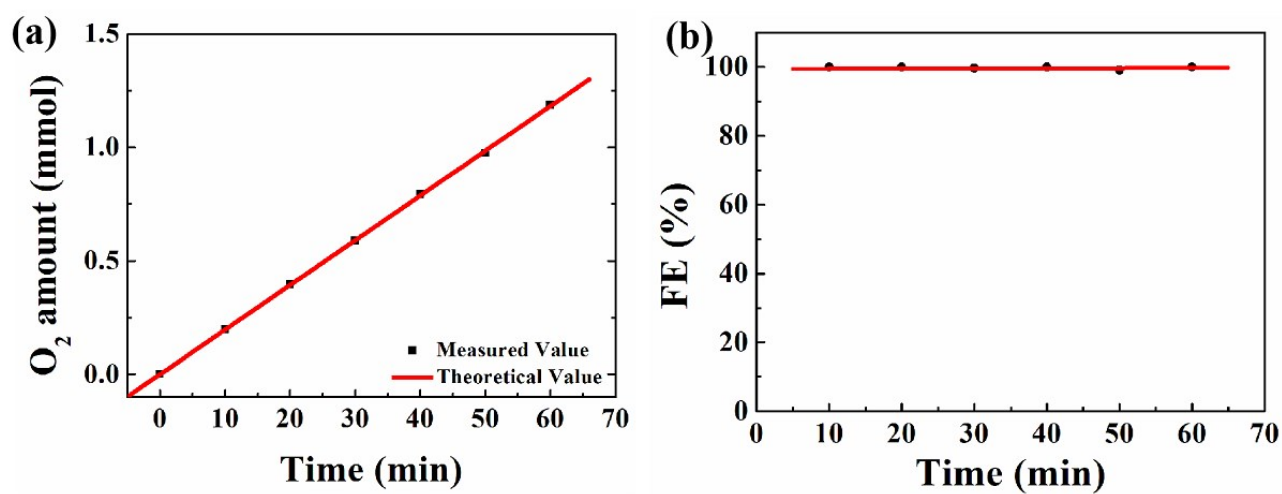

**Fig. S9.** (a) The O<sub>2</sub> amount of C-N-MoS<sub>2</sub>/CC-700 generated at a current density of 10 mA cm<sup>-2</sup> and (b) corresponding Faraday efficiency.

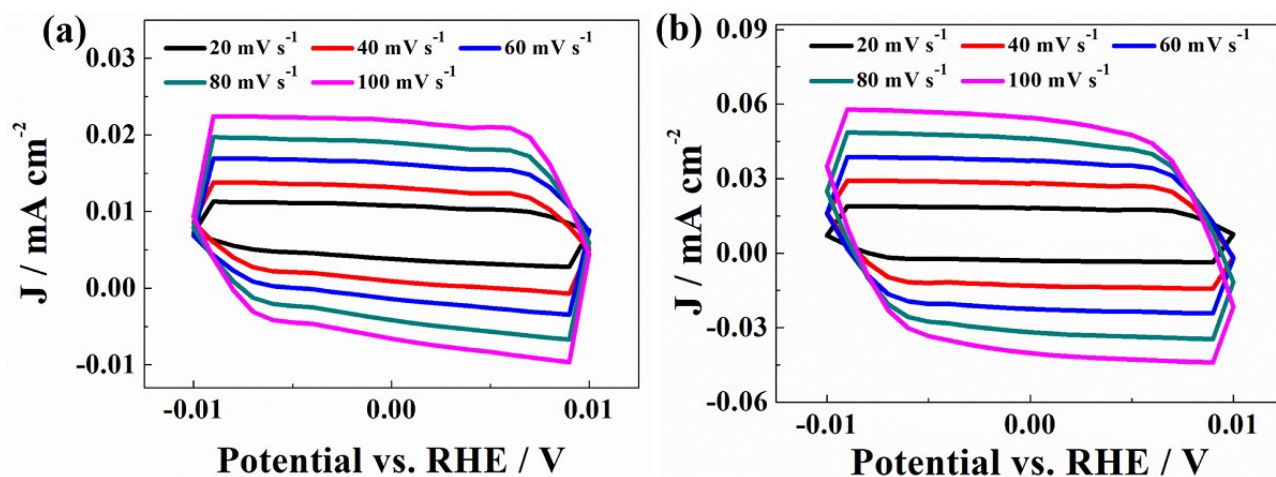

**Fig. S10.** CV curves at various scan rates in the potential range -0.01~0.01 V vs. RHE for (a) MoS<sub>2</sub>/CC, (b) C-N-MoS<sub>2</sub>/CC-700, respectively.

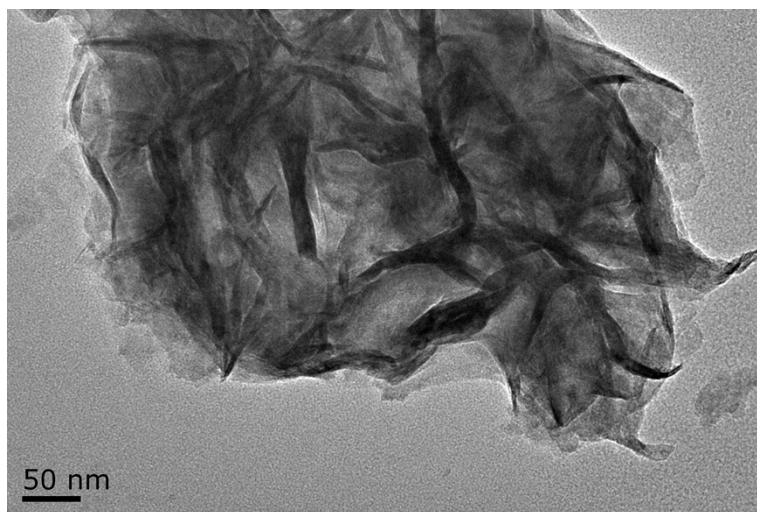

**Fig. S11.** The TEM image of the C-N-MoS<sub>2</sub>/CC-700 after OER.

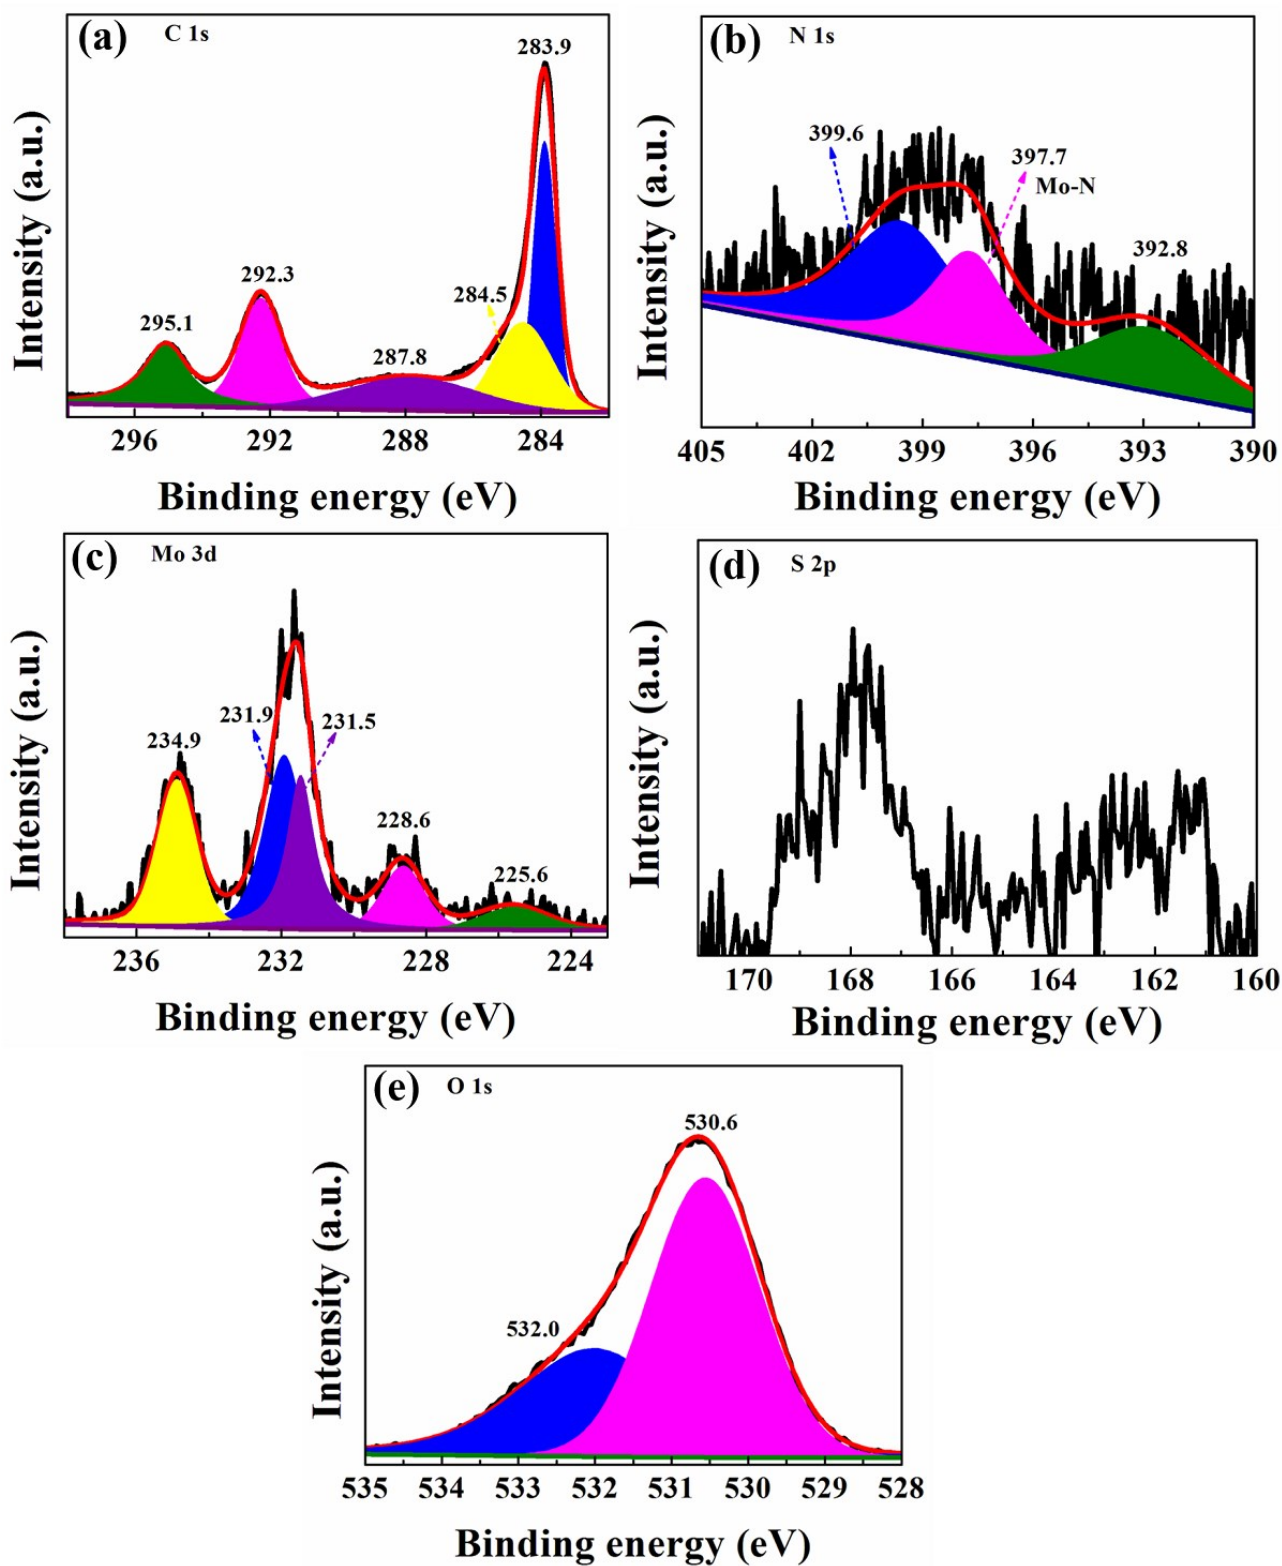

Fig. S12. The XPS spectra of the C-N-MoS<sub>2</sub>/CC-700 after OER.

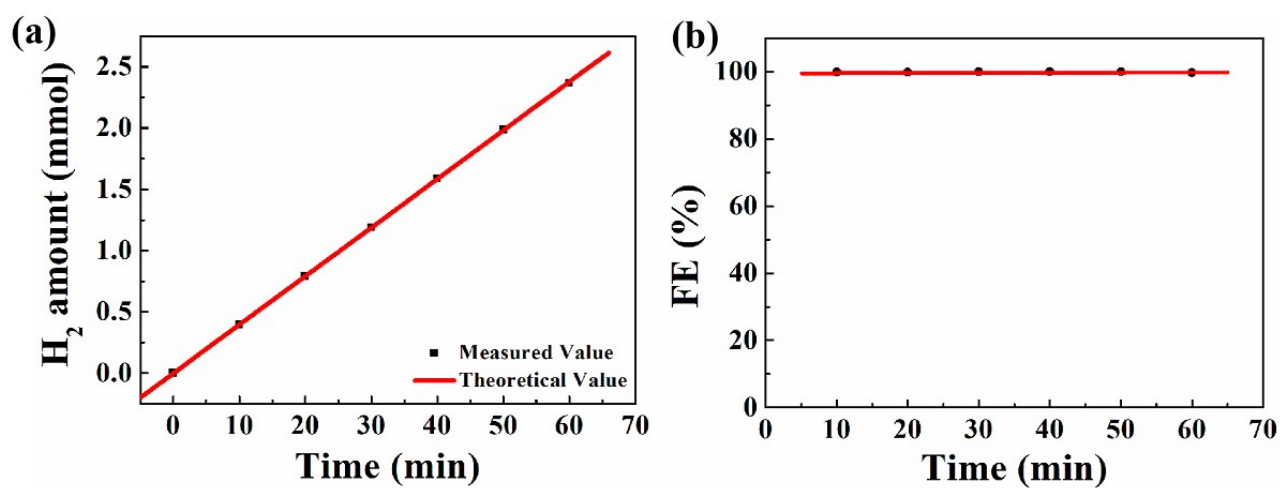

**Fig. S13.** (a) The H<sub>2</sub> amount of C-N-MoS<sub>2</sub>/CC-700 generated at a current density of 10 mA cm<sup>-2</sup> and (b) corresponding Faraday efficiency.

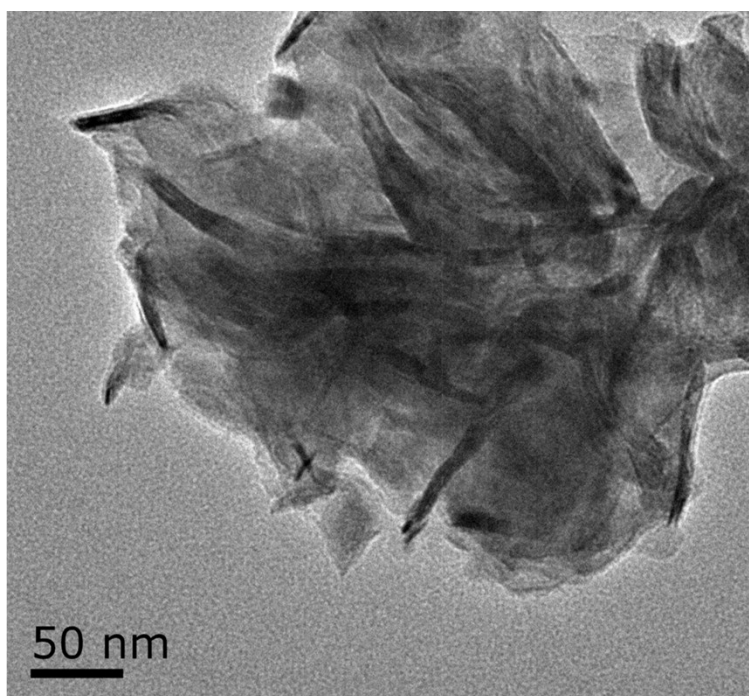

**Fig. S14.** The TEM image of the C-N-MoS<sub>2</sub>/CC-700 after HER.

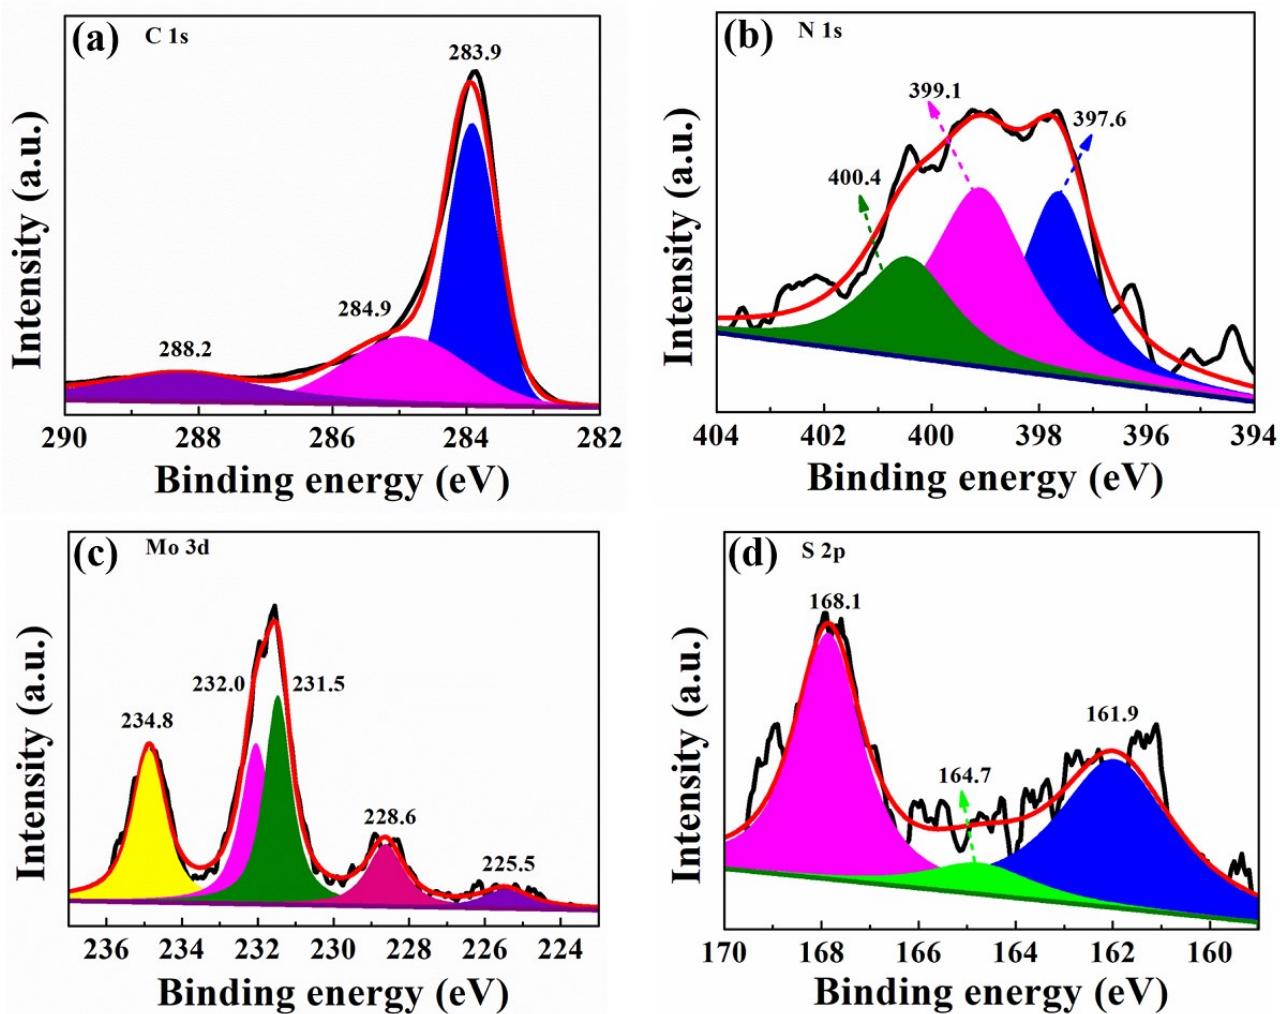

Fig. S15. The XPS spectra of the C-N-MoS<sub>2</sub>/CC-700 after HER.



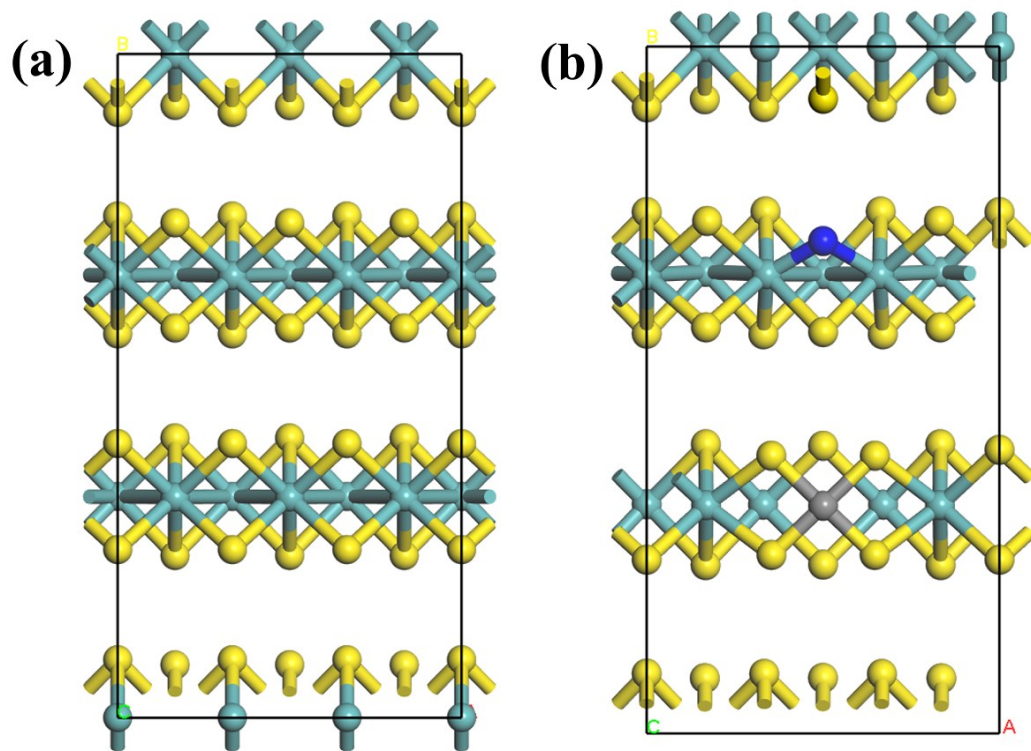

**Fig. S16.** The optimized atomic structure model for (a) MoS<sub>2</sub> and (b) C-N-MoS<sub>2</sub>-700.

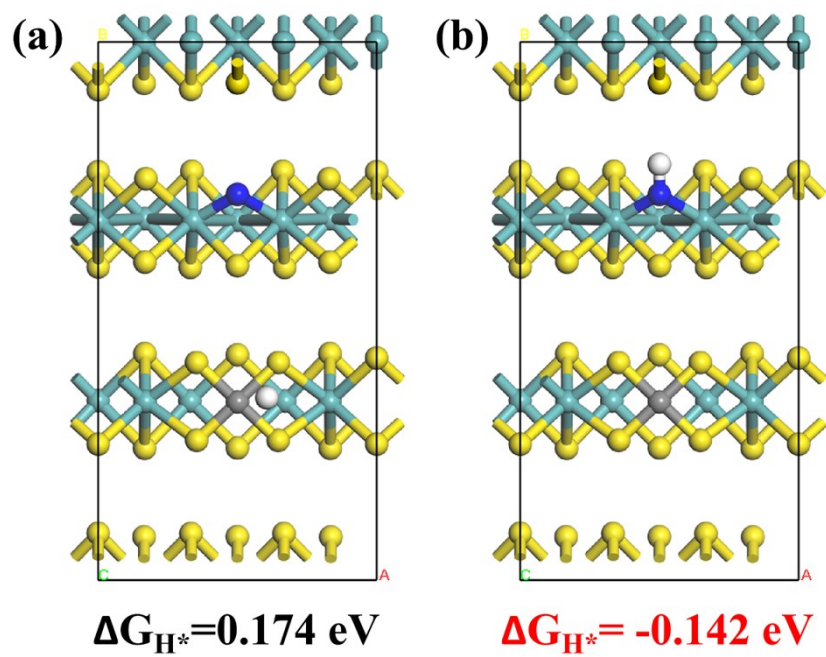

**Fig. S17.** The influence of different adsorption active sites.

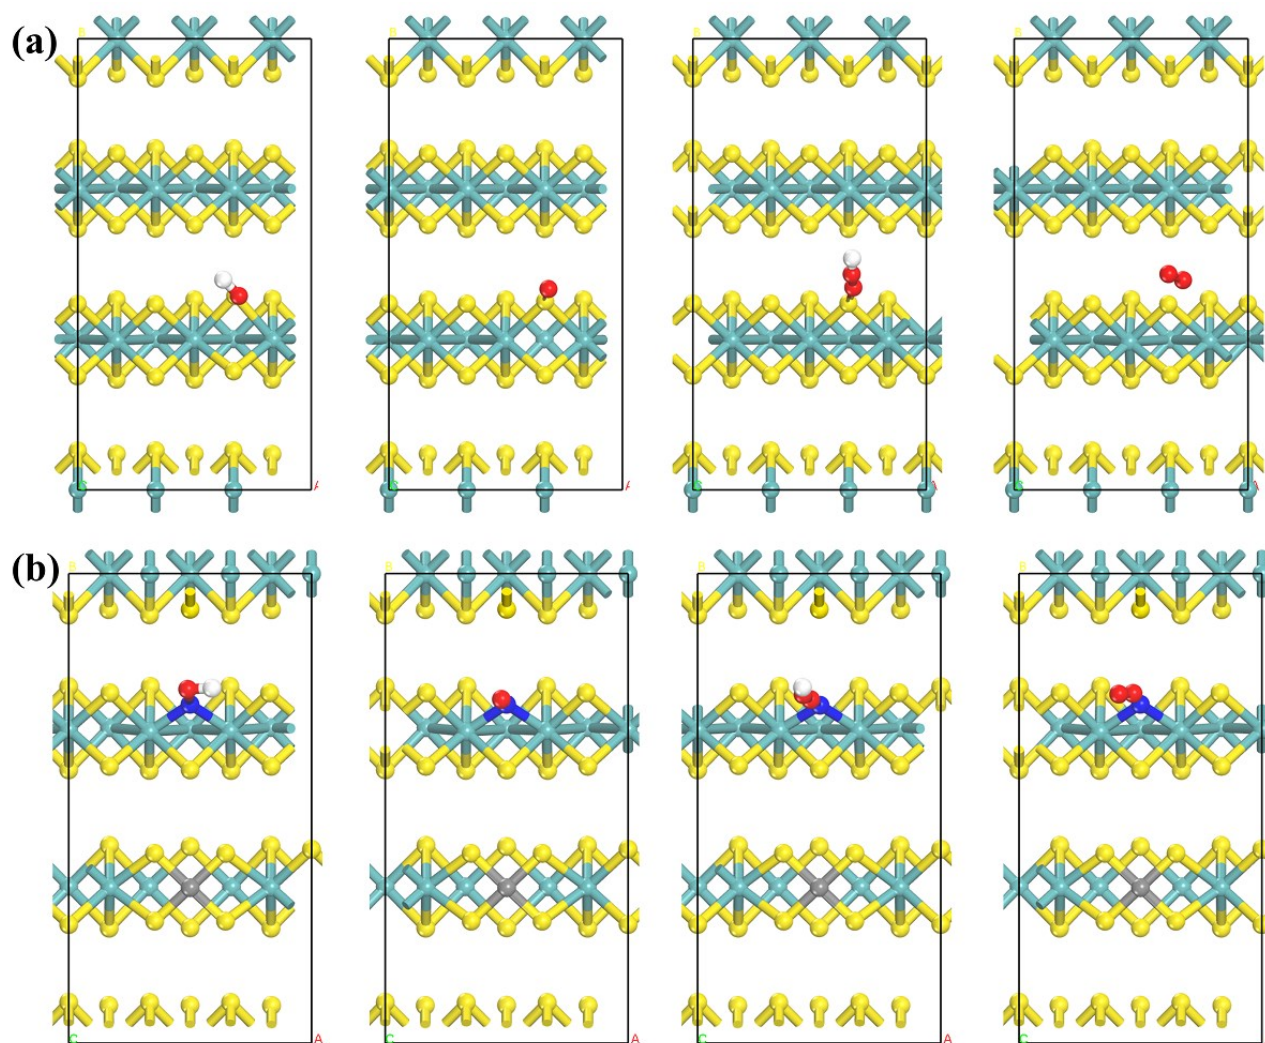

**Fig. S18.** The intermediates configuration of OER for (a) pure MoS<sub>2</sub> and (b) C-N-MoS<sub>2</sub>-700.

Table S1 The atomic ratio of the prepared catalyst analyzed by XPS.

| Sample                            | Atomic concentration (%) |       |      |      | Atomic ratio |
|-----------------------------------|--------------------------|-------|------|------|--------------|
|                                   | C                        | N     | Mo   | S    | C/N          |
| <b>C-N-MoS<sub>2</sub>/CC-550</b> | 53.77                    | 38.67 | 3.14 | 4.42 | 1.4          |
| <b>C-N-MoS<sub>2</sub>/CC-600</b> | 62.71                    | 30.29 | 3.02 | 3.98 | 2.1          |
| <b>C-N-MoS<sub>2</sub>/CC-650</b> | 67.32                    | 25.80 | 2.99 | 3.89 | 2.6          |
| <b>C-N-MoS<sub>2</sub>/CC-700</b> | 74.39                    | 18.98 | 2.87 | 3.76 | 3.9          |
| <b>C-N-MoS<sub>2</sub>/CC-800</b> | 77.14                    | 16.17 | 2.90 | 3.79 | 4.8          |

**Table S2** The comparison of OER performance with state-of-the-art electrocatalysts.

| Materials                                              | Supports | Electrolytes | $\eta_{J=10 \text{ mA cm}^{-2}}$ (mV) | References |
|--------------------------------------------------------|----------|--------------|---------------------------------------|------------|
| CN-MoS <sub>2</sub> /CC-700                            | CC       | 1 M KOH      | 230                                   | This work  |
| MoS <sub>2</sub> /NiS                                  | GC       | 1 M KOH      | 350                                   | 1          |
| CoNC@MoS <sub>2</sub> /CNF                             | GC       | 1 M KOH      | 325                                   | 2          |
| Co(OH) <sub>2</sub> @aMoS <sub>2+x</sub>               | -        | 1 M KOH      | 380                                   | 3          |
| Co <sub>9</sub> S <sub>8</sub> @MoS <sub>2</sub> /CNFs | -        | 1 M KOH      | 430                                   | 4          |
| MoS <sub>2</sub> -Ni <sub>3</sub> S <sub>2</sub> HNRs  | NF       | 1 M KOH      | 249                                   | 5          |

**Table S3** TOF of the as-prepared catalysts at overpotential of 200, 250 and 300 mV corresponding to OER.

| <b>TOF s<sup>-1</sup>(mV)</b><br><b>Samples</b> | <b><math>\eta=200</math></b> | <b>250</b> | <b>300</b> |
|-------------------------------------------------|------------------------------|------------|------------|
| <b>MoS<sub>2</sub>/CC</b>                       | 0.00843                      | 0.0120     | 0.0150     |
| <b>C-N-MoS<sub>2</sub>/CC-550</b>               | 0.0201                       | 0.0294     | 0.0375     |
| <b>C-N-MoS<sub>2</sub>/CC-600</b>               | 0.0326                       | 0.0494     | 0.0821     |
| <b>C-N-MoS<sub>2</sub>/CC-650</b>               | 0.0471                       | 0.0657     | 0.1050     |
| <b>C-N-MoS<sub>2</sub>/CC-700</b>               | 0.0827                       | 0.1260     | 0.1530     |
| <b>C-N-MoS<sub>2</sub>/CC-800</b>               | 0.0122                       | 0.0150     | 0.0179     |

**Table S4** The comparison of HER performance with state-of-the-art electrocatalysts.

| Materials                          | Supports | Electrolytes | $\eta_{J=10 \text{ mA cm}^{-2}}$ (mV) | References |
|------------------------------------|----------|--------------|---------------------------------------|------------|
| C-N-MoS <sub>2</sub> /CC-700       | CC       | 1 M KOH      | 90                                    | This work  |
| MoS <sub>2+x</sub> nanoparticles   | -        | 1M KOH       | 310                                   | 1          |
| CoNC@MoS <sub>2</sub> /CNF         | CC       | 1M KOH       | 143                                   | 2          |
| MoS <sub>2</sub> /NiCoS            | GC       | 1 M KOH      | 189                                   | 6          |
| MoS <sub>2</sub> /NiS              | GC       | 1 M KOH      | 244                                   | 7          |
| CoS <sub>x</sub> @MoS <sub>2</sub> | Ni foil  | 1 M KOH      | 146                                   | 8          |
| MoS <sub>2</sub> @CoO              | CC       | 1 M KOH      | 325                                   | 9          |
| NiS <sub>2</sub> /MoS <sub>2</sub> | GC       | 1 M KOH      | 204                                   | 10         |
| OGNs@MoS <sub>2</sub> -40          | -        | 1M KOH       | 125                                   | 11         |

**Table S5** TOF of the as-prepared catalysts at overpotential of 200, 250 and 300 mV corresponding to HER.

| <b>TOF s<sup>-1</sup>(mV)</b><br><b>Samples</b> | <b><math>\eta=200</math></b> | <b>250</b> | <b>300</b> |
|-------------------------------------------------|------------------------------|------------|------------|
| <b>MoS<sub>2</sub>/CC</b>                       | 0.00985                      | 0.0190     | 0.0250     |
| <b>C-N-MoS<sub>2</sub>/CC-550</b>               | 0.0269                       | 0.0334     | 0.0415     |
| <b>C-N-MoS<sub>2</sub>/CC-600</b>               | 0.0386                       | 0.0586     | 0.0861     |
| <b>C-N-MoS<sub>2</sub>/CC-650</b>               | 0.0651                       | 0.0889     | 0.1190     |
| <b>C-N-MoS<sub>2</sub>/CC-700</b>               | 0.1130                       | 0.1470     | 0.1860     |
| <b>C-N-MoS<sub>2</sub>/CC-800</b>               | 0.0181                       | 0.0223     | 0.0272     |



## References

- 1 C. G. Morales-Guio, L. Liardet, M. T. Mayer, S. D. Tilley, M. Grtzel, X. L. Hu, *Angew. Chem. Int. Ed.*, 2015, **54**, 664-667.
- 2 D. X. Ji, S. J. Peng, L. Fan, L. L. Li, X. H. Qin and S. Ramakrishna, *J. Mater. Chem. A*, 2017, **5**, 23898-23908.
- 3 T. Yoon, K. S. Kim, *Adv. Funct. Mater.*, 2016, **26**, 7386-7393.
- 4 H. Zhu, J. F. Zhang, Y. zhang, M. L. Du, Q. F. Wang, *Adv. Mater.*, 2015, **27**, 4752-4759.
- 5 Y. Q. Yang, K. Zhang, H. L. Lin, X. Li, H. C. Chan, L. C. Yang, Q. S. Gao, *ACS Catal.*, 2017, **7**, 2357-2366.
- 6 C. L. Qin, A. X. Fan, X. Zhang, S. Q. Wang, X. L. Yuan and X. P. Dai. *J. Mater. Chem. A*, 2019, **7**, 27594-27602.
- 7 Q. Qin, L. Chen, T. Wei and X. Liu, *Small*, 2019, **15**, 1803639.
- 8 S. Shit, S. Chhetri, S. Bolar, N. C. Murmu, W. Jang, H. Koo and T. Kuila, *ChemElectroChem*, 2019, **6**, 430-438.
- 9 P. Cheng, C. Yuan, Q. Zhou, X. Hu, J. Li, X. Lin, X. Wang, M. Jin, L. Shui and X. Gao, *J. Phys. Chem. C*, 2019, **123**, 5833-5839.
- 10 P. Kuang, T. Tong, K. Fan and J. Yu, *ACS Catal.*, 2017, **7**, 6179-6187.
- 11 V. T. Nguyen, P. A. A. Le, Y. C. Hsu, K. H. Wei. *ACS Appl. Mater. Interfaces*, 2020, **12**, 11533-11542.
